# Supplementary material
Source: PubMed Central journal article supplement (PMC2744824)
Supplement: 125_2009_1472_MOESM1_ESM.pdf [file 125_2009_1472_MOESM1_ESM.pdf]

## Electronic supplementary material

**ESM Table 1** ANCOVA of primary endpoint: change of HbA<sub>1c</sub> (%) – per protocol analysis set

| Comparison of change from baseline in HbA <sub>1c</sub> after 26 weeks of treatment |           |              |      |              |                |            |
|-------------------------------------------------------------------------------------|-----------|--------------|------|--------------|----------------|------------|
| Treatment/comparison                                                                | Estimates |              |      | Testing      |                |            |
|                                                                                     | <i>n</i>  | LS mean      | SE   |              |                |            |
| Liraglutide 1.8 mg                                                                  | 195       | -1.35        | 0.09 |              |                |            |
| Main                                                                                | 205       | -1.10        | 0.09 |              |                |            |
| Secondary                                                                           | 90        | -0.35        | 0.11 |              |                |            |
| Estimated treatment differences                                                     | LS mean   | 95% CI       |      | Hypothesis   | <i>p</i> value | Conclusion |
| Liraglutide 1.8 mg: secondary                                                       | -1.00     | -1.19, -0.80 |      | Superior     | <0.0001*       | Yes        |
| Liraglutide 1.8 mg: main                                                            | -0.25     | -0.40, -0.09 |      | Non-inferior | <0.0001*       | Yes        |
| Liraglutide 1.8 mg: main                                                            | -0.25     | -0.40, -0.09 |      | Superior     | 0.0008*        | Yes        |
| Liraglutide 1.8 mg: secondary                                                       | -0.75     | -0.94, -0.55 |      | Superior     | <0.0001*       | Yes        |

\*Statistical significance on a 2.5% level

LS, Least square
