# Supplementary material
Source: PubMed Central journal article supplement (PMC2744824)
Supplement: 125_2009_1472_MOESM2_ESM.pdf [file 125_2009_1472_MOESM2_ESM.pdf]

**Electronic supplementary material**

**ESM Table 2** Adverse events (occurring in >1% in any treatment group) by system organ class and preferred term: safety analysis set

| Class/set                                           | Liraglutide 1.8 + OGLA |      |     | OGLA     |      |     | Glargine + OGLA |      |     |
|-----------------------------------------------------|------------------------|------|-----|----------|------|-----|-----------------|------|-----|
|                                                     | <i>n</i>               | %    | E   | <i>n</i> | %    | E   | <i>n</i>        | %    | E   |
| Safety analysis set                                 | 230                    |      |     | 114      |      |     | 232             |      |     |
| Adverse events                                      | 151                    | 65.7 | 424 | 64       | 56.1 | 168 | 127             | 54.7 | 295 |
| Gastrointestinal disorders                          | 87                     | 37.8 | 157 | 18       | 15.8 | 27  | 18              | 7.8  | 31  |
| Nausea                                              | 32                     | 13.9 | 41  | 4        | 3.5  | 4   | 3               | 1.3  | 3   |
| Diarrhoea                                           | 23                     | 10.0 | 29  | 6        | 5.3  | 7   | 3               | 1.3  | 6   |
| Dyspepsia                                           | 15                     | 6.5  | 16  | 1        | 0.9  | 1   | 4               | 1.7  | 4   |
| Vomiting                                            | 15                     | 6.5  | 18  | 4        | 3.5  | 4   | 1               | 0.4  | 1   |
| Abdominal pain upper                                | 10                     | 4.3  | 14  | 2        | 1.8  | 3   | 2               | 0.9  | 3   |
| Constipation                                        | 5                      | 2.2  | 5   |          |      |     | 2               | 0.9  | 3   |
| Toothache                                           | 5                      | 2.2  | 5   |          |      |     | 3               | 1.3  | 3   |
| Abdominal discomfort                                | 3                      | 1.3  | 6   | 2        | 1.8  | 3   | 1               | 0.4  | 1   |
| Abdominal distension                                | 3                      | 1.3  | 4   | 1        | 0.9  | 1   | 1               | 0.4  | 1   |
| Gastritis                                           | 3                      | 1.3  | 3   |          |      |     | 1               | 0.4  | 1   |
| Infections and infestations                         | 51                     | 22.2 | 72  | 36       | 31.6 | 45  | 63              | 27.2 | 89  |
| Nasopharyngitis                                     | 21                     | 9.1  | 23  | 10       | 8.8  | 10  | 26              | 11.2 | 32  |
| Bronchitis                                          | 7                      | 3.0  | 7   | 1        | 0.9  | 1   | 3               | 1.3  | 3   |
| Gastroenteritis                                     | 3                      | 1.3  | 3   | 1        | 0.9  | 1   | 3               | 1.3  | 3   |
| Urinary tract infection                             | 3                      | 1.3  | 4   | 2        | 1.8  | 2   | 3               | 1.3  | 3   |
| Viral infection                                     | 3                      | 1.3  | 3   | 1        | 0.9  | 1   | 2               | 0.9  | 2   |
| Influenza                                           | 2                      | 0.9  | 2   | 5        | 4.4  | 5   | 8               | 3.4  | 9   |
| Pharyngitis                                         | 2                      | 0.9  | 2   | 5        | 4.4  | 5   | 2               | 0.9  | 3   |
| Acute tonsillitis                                   | 1                      | 0.4  | 2   |          |      |     | 3               | 1.3  | 4   |
| Lower respiratory tract infection                   | 1                      | 0.4  | 1   | 1        | 0.9  | 2   | 3               | 1.3  | 3   |
| Pneumonia                                           |                        |      |     | 2        | 1.8  | 2   | 3               | 1.3  | 3   |
| Sinusitis                                           |                        |      |     | 2        | 1.8  | 2   | 3               | 1.3  | 3   |
| Nervous system disorders                            | 29                     | 12.6 | 43  | 11       | 9.6  | 18  | 24              | 10.3 | 32  |
| Headache                                            | 22                     | 9.6  | 33  | 9        | 7.9  | 14  | 13              | 5.6  | 18  |
| Dizziness                                           | 3                      | 1.3  | 3   | 2        | 1.8  | 2   | 1               | 0.4  | 1   |
| Musculoskeletal and connective tissue disorders     | 22                     | 9.6  | 35  | 15       | 13.2 | 20  | 34              | 14.7 | 43  |
| Back pain                                           | 7                      | 3.0  | 17  | 3        | 2.6  | 3   | 8               | 3.4  | 10  |
| Arthralgia                                          | 4                      | 1.7  | 4   | 3        | 2.6  | 3   | 6               | 2.6  | 8   |
| Musculoskeletal pain                                | 3                      | 1.3  | 3   | 2        | 1.8  | 2   | 4               | 1.7  | 4   |
| Neck pain                                           | 3                      | 1.3  | 4   |          |      |     | 1               | 0.4  | 1   |
| Muscle spasms                                       | 2                      | 0.9  | 3   | 3        | 2.6  | 3   | 3               | 1.3  | 3   |
| Myalgia                                             |                        |      |     | 1        | 0.9  | 1   | 3               | 1.3  | 3   |
| Metabolism and nutrition disorders                  | 20                     | 8.7  | 23  | 7        | 6.1  | 7   | 5               | 2.2  | 5   |
| Anorexia                                            | 10                     | 4.3  | 10  | 1        | 0.9  | 1   |                 |      |     |
| Dyslipidaemia                                       | 3                      | 1.3  | 3   | 3        | 2.6  | 3   | 1               | 0.4  | 1   |
| General disorders and administration site condition | 13                     | 5.7  | 15  | 4        | 3.5  | 5   | 10              | 4.3  | 13  |
| Pyrexia                                             | 5                      | 2.2  | 5   | 1        | 0.9  | 1   | 5               | 2.2  | 7   |
| Investigations                                      | 12                     | 5.2  | 14  | 2        | 1.8  | 3   | 6               | 2.6  | 8   |
| Blood calcitonin increased                          | 3                      | 1.3  | 3   |          |      |     |                 |      |     |
| Cardiac disorders                                   | 10                     | 4.3  | 10  | 4        | 3.5  | 4   | 9               | 3.9  | 10  |
| Eye disorders                                       | 8                      | 3.5  | 8   | 4        | 3.5  | 4   | 10              | 4.3  | 11  |
| Diabetic retinopathy                                | 2                      | 0.9  | 2   | 3        | 2.6  | 3   | 4               | 1.7  | 4   |
| Vascular disorders                                  | 8                      | 3.5  | 8   | 5        | 4.4  | 5   | 8               | 3.4  | 8   |
| Hypertension                                        | 7                      | 3.0  | 7   | 3        | 2.6  | 3   | 5               | 2.2  | 5   |
| Respiratory, thoracic and mediastinal disorders     | 7                      | 3.0  | 9   | 6        | 5.3  | 8   | 10              | 4.3  | 17  |
| Cough                                               | 4                      | 1.7  | 6   | 1        | 0.9  | 1   | 7               | 3.0  | 12  |
| Pharyngolaryngeal pain                              | 2                      | 0.9  | 2   | 2        | 1.8  | 3   | 1               | 0.4  | 1   |
| Psychiatric disorders                               | 4                      | 1.7  | 4   | 7        | 6.1  | 8   |                 |      |     |
| Depression                                          | 2                      | 0.9  | 2   | 3        | 2.6  | 3   |                 |      |     |
| Anxiety                                             | 1                      | 0.4  | 1   | 3        | 2.6  | 3   |                 |      |     |
| Skin and subcutaneous tissue disorders              | 4                      | 1.7  | 6   |          |      |     | 5               | 2.2  | 6   |
| Rash                                                | 3                      | 1.3  | 5   |          |      |     | 2               | 0.9  | 2   |
| Ear and labyrinth disorders                         | 3                      | 1.3  | 3   | 2        | 1.8  | 2   | 2               | 0.9  | 3   |
| Vertigo                                             | 3                      | 1.3  | 3   |          |      |     | 1               | 0.4  | 2   |
| Motion sickness                                     |                        |      |     | 2        | 1.8  | 2   |                 |      |     |
| Hepatobiliary disorders                             | 3                      | 1.3  | 3   | 1        | 0.9  | 1   |                 |      |     |
| Renal and urinary disorders                         | 3                      | 1.3  | 3   | 1        | 0.9  | 1   | 7               | 3.0  | 7   |
| Reproductive system and breast disorders            | 3                      | 1.3  | 3   |          |      |     |                 |      |     |
| Injury, poisoning and procedural complications      | 1                      | 0.4  | 1   | 6        | 5.3  | 7   | 8               | 3.4  | 8   |
| Fall                                                |                        |      |     | 2        | 1.8  | 2   | 1               | 0.4  | 1   |

E, number of adverse events; *n*, number of participants with adverse event; OGLA, oral glucose-lowering agent; %, proportion of participants in analysis set having adverse events
