# Supplementary material
Source: PubMed Central journal article supplement (PMC2744824)
Supplement: 125_2009_1472_MOESM3_ESM.pdf [file 125_2009_1472_MOESM3_ESM.pdf]

## Electronic supplementary material

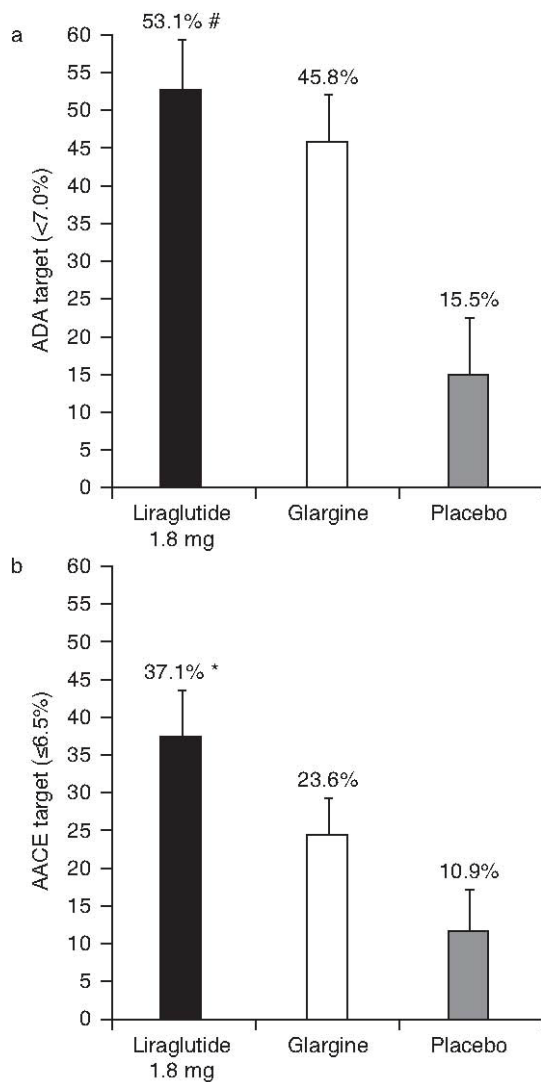

**ESM Fig. 1** Patients reaching (a) American Diabetes Association [1]; and (b) American Association of Clinical Endocrinologists [2] targets for glycaemic control (last observation carried forward, intention-to-treat population). \* Significant vs glargine ( $p=0.0001$ ) and placebo ( $p<0.0001$ ); # significant vs glargine ( $p=0.0139$ ) and placebo ( $p<0.0001$ )

## References

1. American Diabetes Association (2008) Standards of medical care in diabetes – 2008. *Diabetes Care* 31(Suppl 1):S12–S54.
2. AACE Diabetes Mellitus Clinical Practice Guidelines Task Force (2007) American Association of Clinical Endocrinologists medical guidelines for clinical practice for the management of diabetes mellitus. *Endocr Pract* 13(Suppl 1): 1–66.
