# Supplementary material
Source: PubMed Central journal article supplement (PMC2744824)
Supplement: 125_2009_1472_MOESM4_ESM.pdf [file 125_2009_1472_MOESM4_ESM.pdf]

## Electronic supplementary material

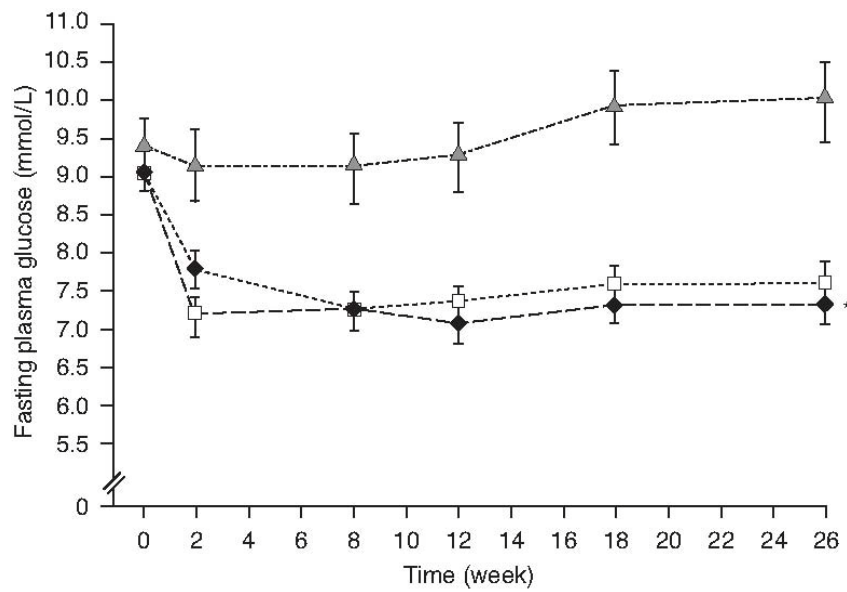

**ESM Fig. 2** Fasting plasma glucose over time (last observation carried forward, intention-to-treat population). Liraglutide 1.8 mg (squares); glargine (diamonds); placebo (triangles).

\*Significant vs placebo ( $p=0.0001$ ) but not glargine
