# Supplementary material
Source: PubMed Central journal article supplement (PMC2744824)
Supplement: 125_2009_1472_MOESM5_ESM.pdf [file 125_2009_1472_MOESM5_ESM.pdf]

## Electronic supplementary material

### LEAD 5 Investigators

*Argentina* M. Rodriguez, Instituto Clínica Médica y Diabetes, Mendoza; H. Cintora, FAMYL, Junín; A. Libman, Centro Integral Cardiovascular, Rosario; A. Sosa, Instituto de Endocrinología y Nutrición, Bahía Blanca; M. Jadzinsky, Instituto Medico Especializado, Ciudad Autonoma de Buenos Aires.

*Austria* G. Schernthaner, Rudolfstiftung, Wien; G. Sokol, GZ Hetzendorf, Wien; K. Elcic-Mihaljevic, Ordination Elcic-Mihaljevic, Wien; B. Föger, LKH Bregenz, Bregenz; B. Ludvik, Uniklinik Wien Innere Med. III, Wien; R. Prager, KH Hietzing, Wien; S. Pusarnig, Wien.

*Brazil* W. Bernando, Incor/HC/FMUSP, São Paulo; R. Kupfer, IEDE, Rio de Janeiro; E. Oliveira, Hospital Universitario, Rio de Janeiro; M. Dinato, Hospital Guilherme Alvaro, San Paulo; E. Niclewicz, Centro de Diabetes de Curitiba, Curitiba; O. Monte, Santa Misericordia, Sao Paulo.

*Denmark* O. Schmitz, Århus Sygehus NBG, Århus C; T. Krarup, Med. F KAS, Hellerup; B. Thorsteinsson, Hillerød Sgh., Med. Afd., Hillerød; L. P. H. Andersen, Esbjerg Sygehus, Esbjerg; H. Hansen, Slagelse Sygehus, Slagelse; A. Vaag, Steno Diabetes Center, Gentofte; A. L. Svenningsen, Roskilde Amtssygehus, Roskilde; E. Christiansen, Roskilde Amtssygehus, Roskilde.

*Finland* M. Vähätalo, Turun TK, Turku; A. Virkamäki, Mehiläinen, Helsinki; N. Uhlenius, Laakso, Helsinki; L. Hiltunen, Oulun TK, Oulun kaupunki; L. Niskanen, KYS, Kuopio.

*France* C. Le Devehat, C.H. de Nevers, Nevers; J.-P. Courreges, C.H.G. de Narbonne, Narbonne; P. Serusclat, Clinique des Minguettes, Venissieux; A. Penfornis, Hôpital Jean Minjoz, Besancon; G. Charpentier, Hopital Gilles De Corbeil, Corbeil Essonnes; D. Gouet, CentreHospitalier, La Rochelle; M. Levy, Hôpital de Nanterre, Nanterre; P. Monguillon, 17 rue Auguste Kervern, Brest; J.-M. Brun, Hopital Du Bocage, Dijon.

*India* S. Kalra, Bharti Hospital, Karnal; A. Kumar, Diabetes Care & Research Centr, Patna; S. Kale, Orange Diabetes Clinic, Pune; B. K. Sethi, Care Hospitals, Hyderabad; J. Ramesh, Sai Endocrine Centre, Hyderabad.

*Italy* V. Borzì, Ospedale Vittorio Emanuele II, Catania; R. Trevisan, Ospedali Riuniti di Bergamo, Bergamo; D. Fedele, Ospedale ai Colli, Padova; L. Arsenio, Ospedale di Parma, Parma; F. Dotta, Azienda

Ospedaliera-Universitaria Senese, Siena; G. Sesti, Policlinico di Catanzaro, Catanzaro; P. Pata, Azienda Ospedaliera Piemonte, Messina; C. Giorda, Ospedale Maggiore, Chieri; V. Chiarini, Ospedale Maggiore, Bologna; A. Consoli, Università D'Annunzio, Chieti Scalo.

*The Netherlands* P. H. L. M. Geelhoed-Duijvestijn, Westeinde, Den Haag; T. Koster, Groene Hart Bluelandlocatie, Gouda; A. G. Lieverse, MMC Eindhoven, Eindhoven; J. Sels, Academisch Ziekenhuis,, Maastricht; H. Waanders, 't Lange Land, Zoetermeer; S. Seinen, Streekziekenhuis, Zevenaar; M. A. Hakim, EB Flevoresearch, Almere; P. P. Viergever, Gemini, Den Helder; Norway: B. Kilhovd, Bærum sykehus, Gjettem; E. Husebye, Haukeland, Bergen; K. Erichsen, Notodden sykehus, 3675 Notodden; K. Furuseth, Solli Klinikk, Jessheim; P. Vanberg, Sandvika Specialistsenter, Sandvika; I. Følling, Ahus, Nordbyhagen; K. Risberg, Skedsmo Med Senter, Skedsmokorset.

*Philippines* M. A. Lim-Abrahan, PGH, Manila; R. Mirasol, RMC, Pasig City; M. Denopol, Vicente Sotto Memorial Medical Center , Cebu City; R. Fernando, ISDF, Marikina City.

*Poland* K. Strojek, Woj Por Diab Zabrze, Zabrze; M. Janczarska, Gdynia Armii Krajowej Por Dia, Gdynia; K. Glodowska, Niepubliczny Zakład Opieki Zdrowotnej 'DiabMed', Poznan; T. Stasinska, Wroclaw Mikolaja, Wroclaw; T. Franczak, Katowice Barbary, Katowice; T. Urbanska, Opole Witosa, Opole.

*Russian Federation* G. Galstyan, ERC, Moscow; Mkrtumyan, A, Moscow State Medical-Stomatological University, Moscow; I. Demidova, Russian State Medical University, Moscow; M. Balabolkin, Moscow Medical Academy PGMEF, Moscow.

*Serbia* N. Lalic, Clin. Centre, Endocrinology, Belgrade; D. Micic, Clinical Centre Serbia, Endocrinology, Belgrade; S. Jelic, CHC 'Dr Dragisa Misovic', Belgrade; S. Antic, Endocrinology Clinic, Nis.

*Slovakia* E. Martinka, L'ubochna, Endokrinol. ustav, L'ubochna; M. Mokaň, I. Martin, interna klinika, Martin; I. Buganova, Diabetologicka amb, Zilina; L. Fabryova, Diabetologicka amb, Bratislava; J. Okapcova, Fakultna Nemocnica F.D.Roosevelta, Banska Bystrica; I. Markova, Priv out-Patient Dept of Diabetes, Nitra.

*South Africa* P. Joshi, Louis Pasteur Building, Pretoria; A. Bester, Eastmed Medical Centre, Pretoria; R. Rossouw, Rubinsgebou, Bloemfontein; L. Van Zyl, Clinical Projects Research, Worcester; A. Bester, Eastmed Medical Centre, Pretoria.

*Spain* R. S. Canonge, Vall de d'Hebron, Barcelona; E. Romero, Universitario de Valladolid, Valladolid; F. C. Freijoo, Hospital de Conxo, Santiago de Compostela; F. P. Selles, La Fe, Valencia; S. D. García, Valme, Sevilla; J. G. Arnes, Hospital Civil, Málaga; J. F. García, Hospital General de Valencia, Valencia; J. Girbes, Arnau de Vilanova, Valencia; S. M. Megías, Hospital de Getafe, Getafe; S. Gaztambide, Cruces, Baracaldo.

*UK* M. Clements, Watford General Hospital, Watford; D. Collier, Ayr Hospital, Ayr; E. Evans, Royal Glamorgan Hospital, Llantrisant; M. Gibson, Hope Hospital, Salford; S. Heller, Northern General Hospital, Sheffield; P. Mansell, QMC – Diabetes, Nottingham; D. Russell-Jones, Royal Surrey County Hospital, Guildford; J. Stephens, Morrison Hospital (Diabetes), Swansea; W. P. Stephens, Trafford General Hospital, Manchester; J. Walker, St John's Hospital, Livingstone; D. Whitelaw, Bradford Royal Infirmary, Bradford; J. Wilding, University Hospital, Liverpool.
